# Supplementary material
Source: publisher site journal article supplement (https://www.dovepress.com/article/271850)
Supplement: Supplementary file 1 [file get_supplementary_file.php]

**Supporting information**

**Figure-1**


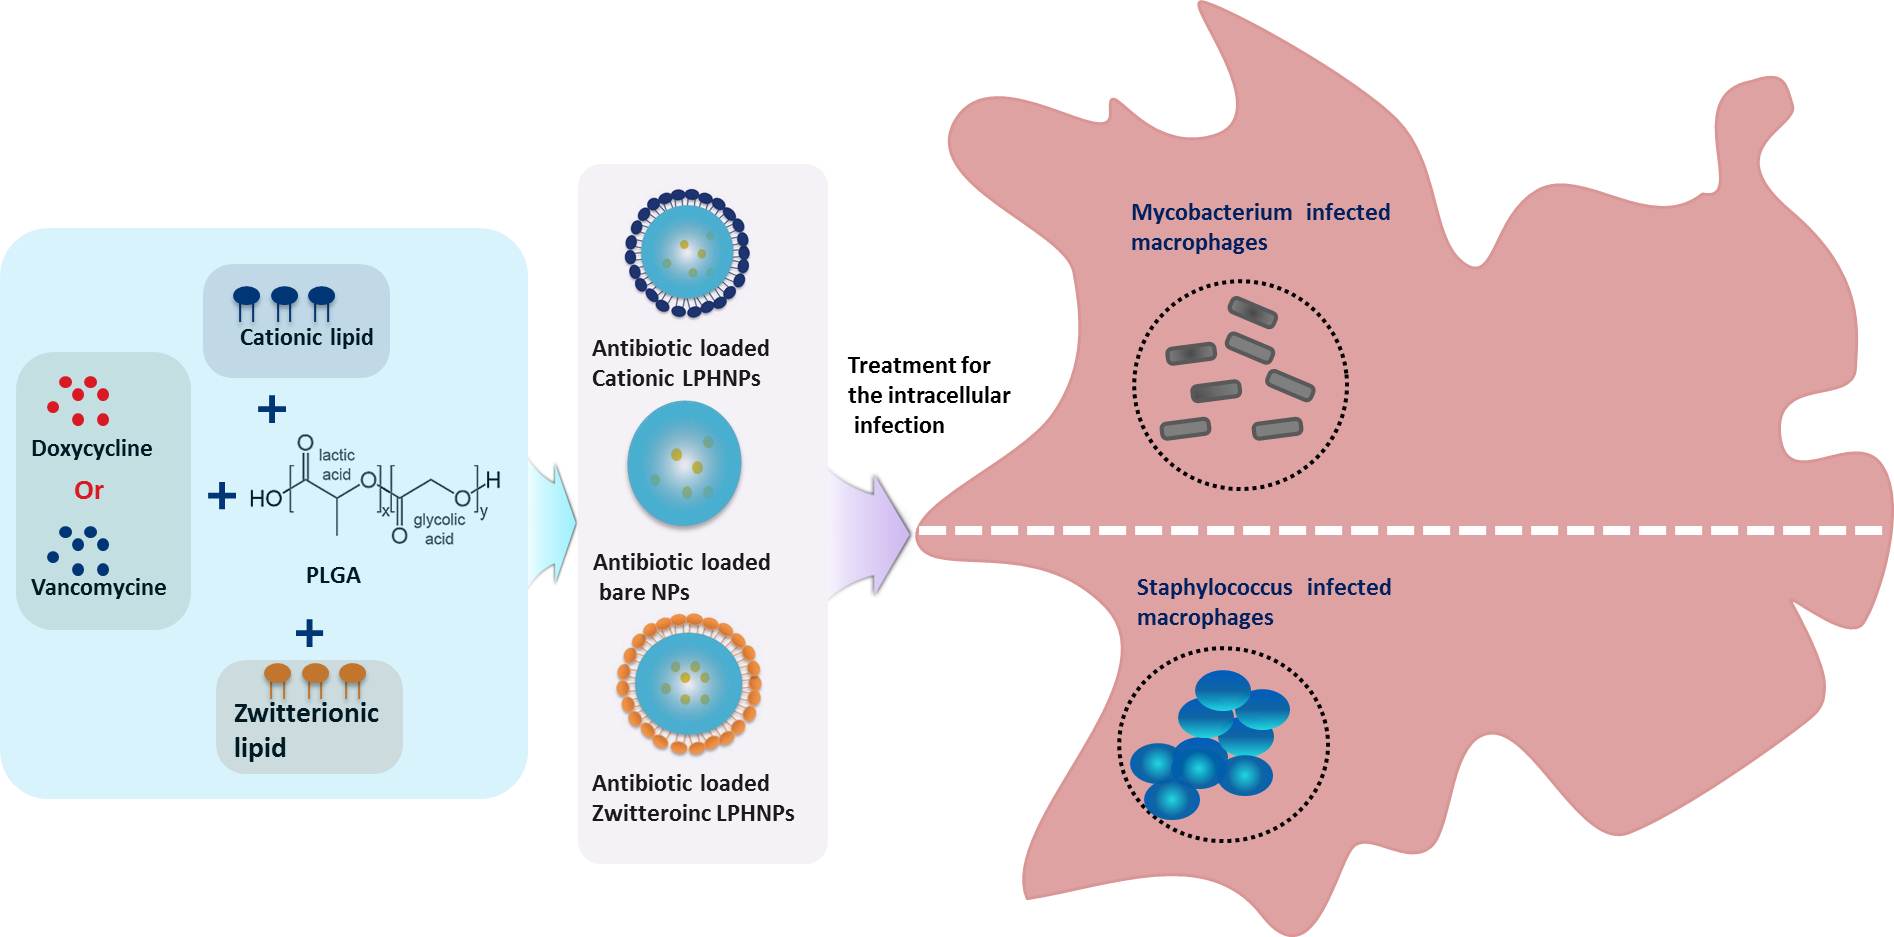
The **figure S1** outlines the schematic diagram of the experimental design anddisplays the production ofdifferent hybrid nano-formulations of drug-loaded cationic or zwitterionic LPHNPs and non-lipid layered bare BNPs using modified emulsion solvent-evaporation process **Supporting information Figure -2**


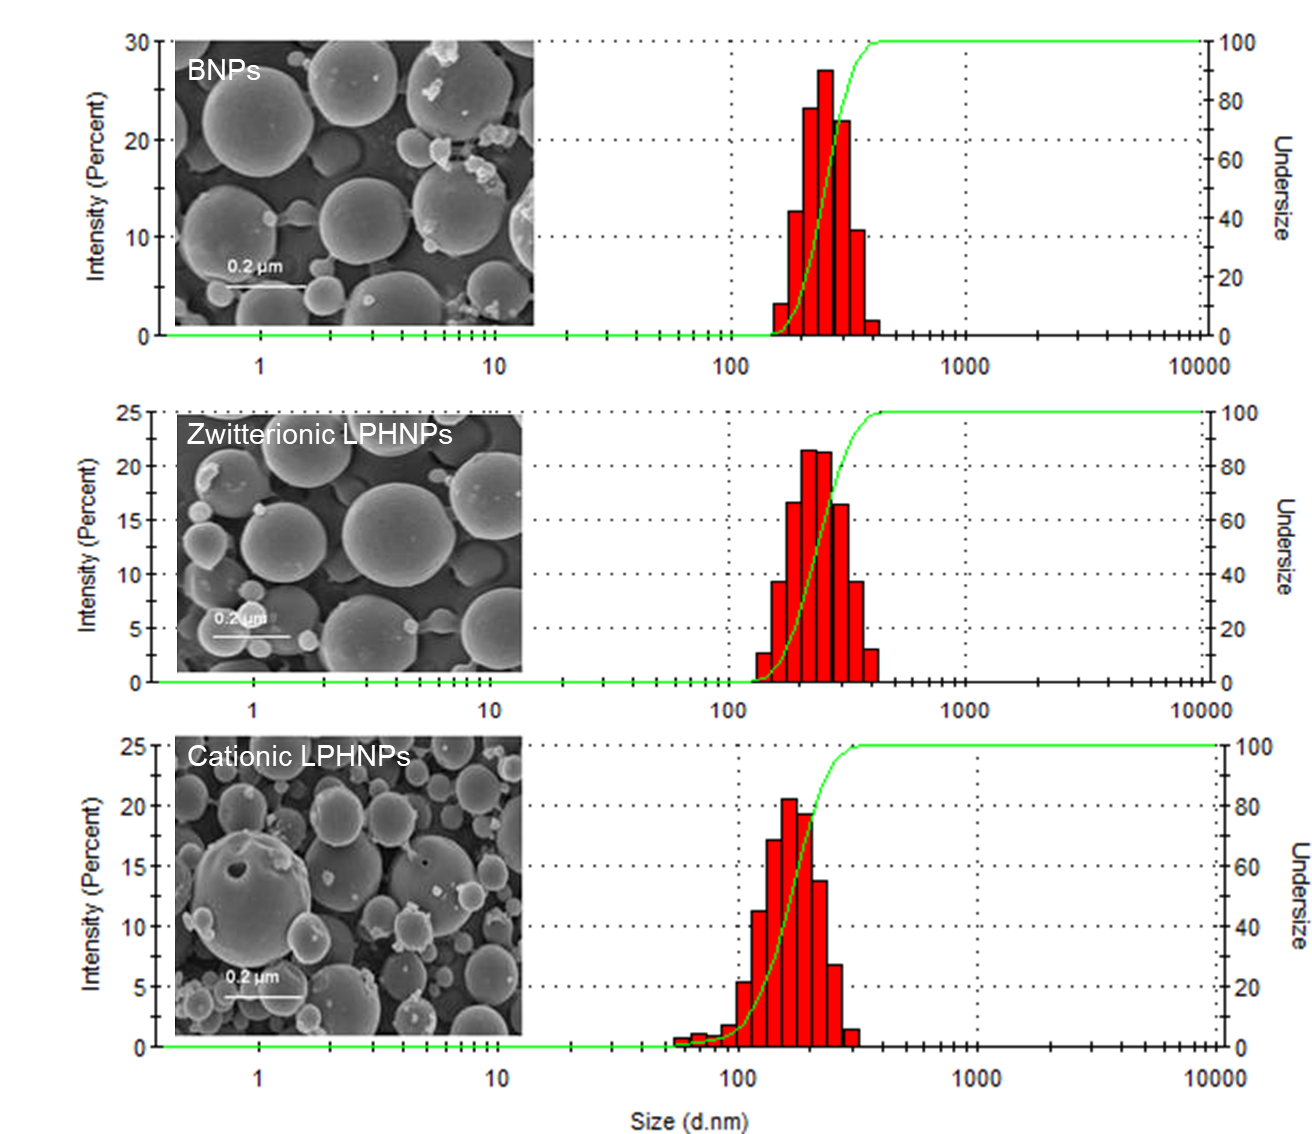
 **Figure S2** displays the physiochemical characterization (Size and Shape) of formulated nanohybrids.

**Supporting information Figure- 3**


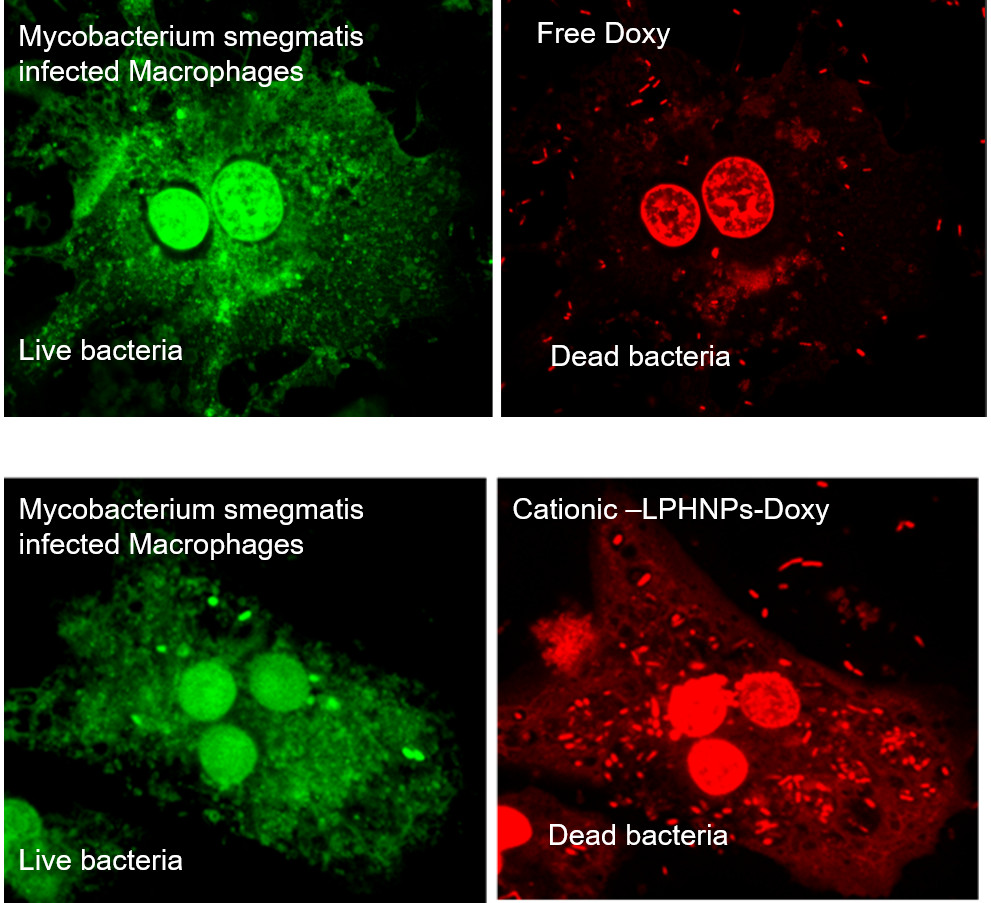


The **figure S3** showsthe LIVE/DEAD BacLight bacterial viability assays to distinguish between dead (labeled in red) and live (labeled in red-green) after the treatment of LPHNPs loaded with doxycycline

**Supporting information Figure- 4**


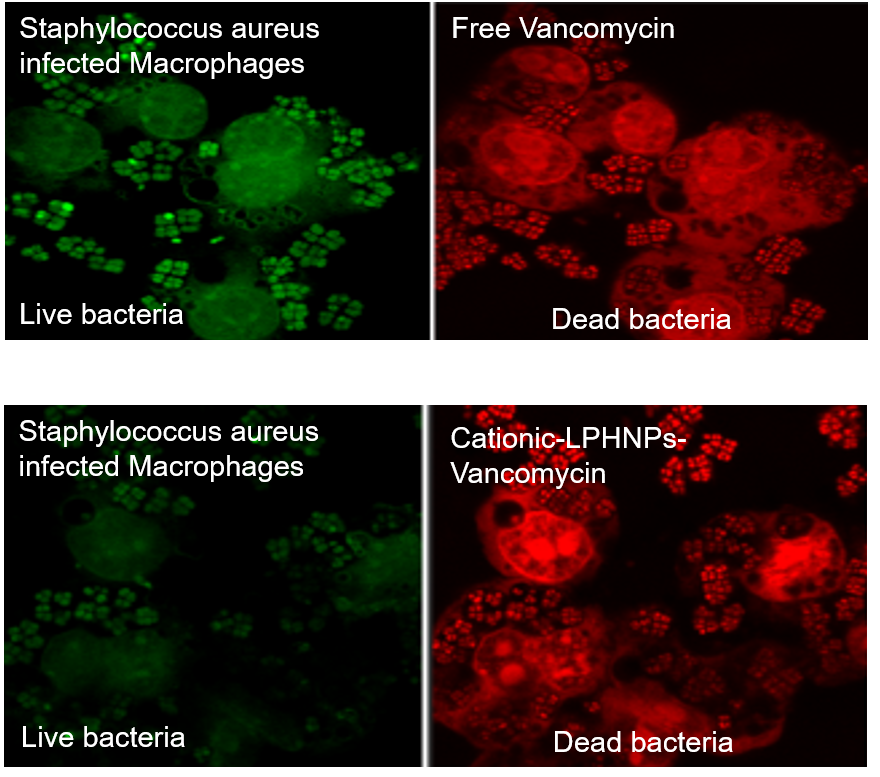


The **figure S4** showsthe LIVE/DEAD BacLight bacterial viability assays to distinguish between dead (labeled in red) and live (labeled in red-green) after the treatment of LPHNPs loaded with vancomycin.

**Supporting information Figure- 5**


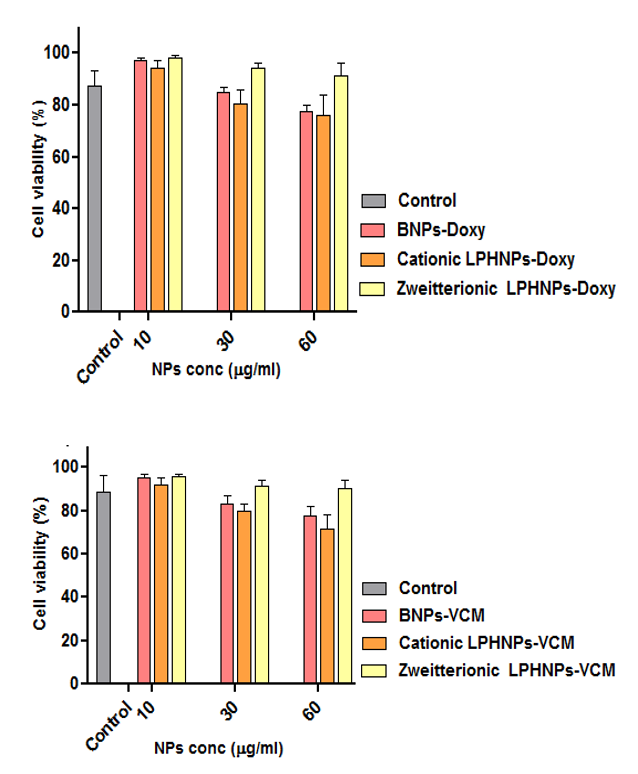


The **figure S5** showsthe results of cytotoxicity of BNPs and different LPHNPs formulation loaded with Doxycycline or Vancomycin treatment on macrophages.

**Supporting information Figure- 6**

The **figure S6** showsthe stability of BNPs and different LPHNPs formulation loaded with Doxycycline or Vancomycin up to 2 weeks analyzed by DLS
